# Supplementary material
Source: PubMed Central journal article supplement (PMC2891877)

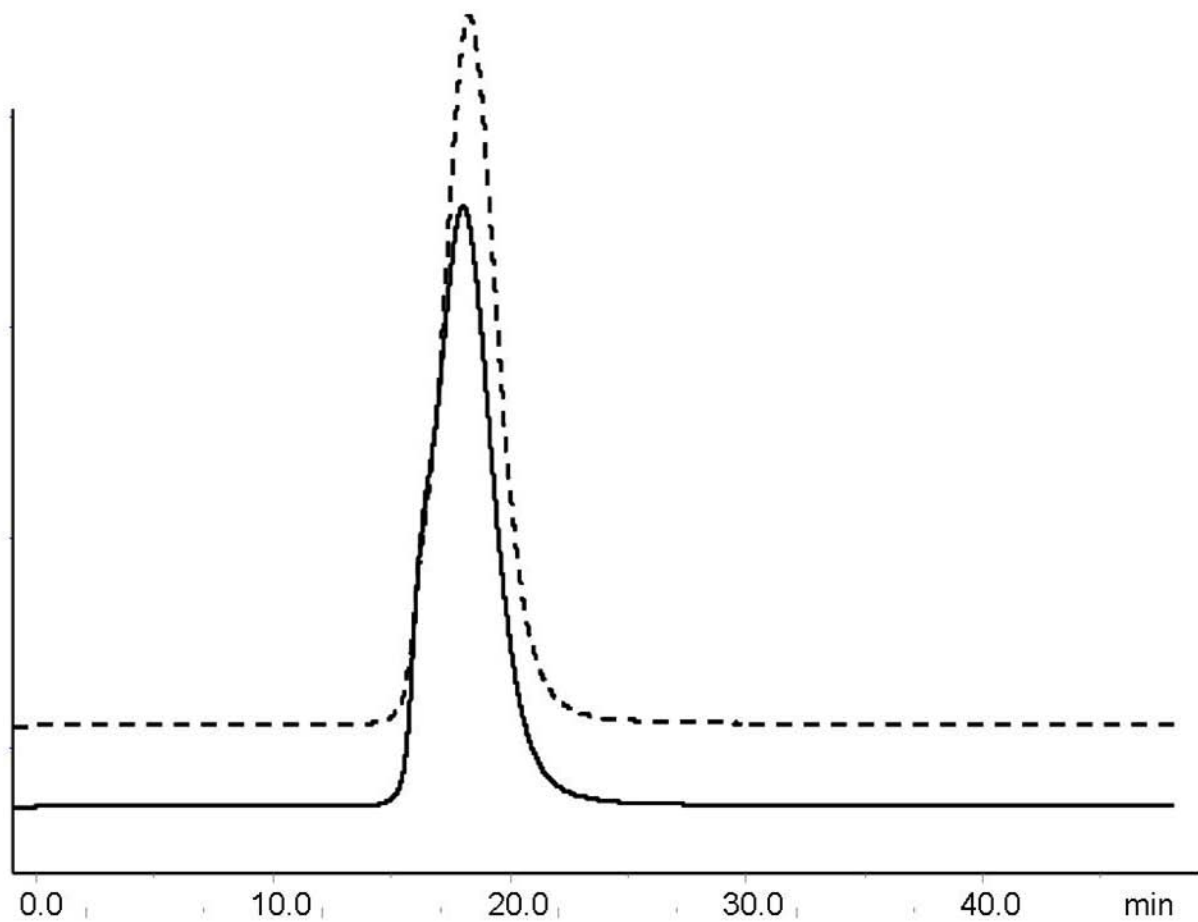

Supplement: NIHMS136200-supplement-3_si_003.pdf [file NIHMS136200-supplement-3_si_003.pdf]
